# Supplementary material
Source: publisher site journal article supplement (https://en-cdn.bio-protocol.org/attached/file/20201111/3825%20Supplementary%20file%20Matlab%20Analysis%20code.docx)
Supplement: Supplementary file 1 [file 3825%20Supplementary%20file%20Matlab%20Analysis%20code.docx]

clear all

%%% Section 1 : User defined parameters

filname="D:\krish programs\Spots in tracks statistics.csv";

no_fr=4;

threshold_time=5;

thresh_dist=0.15;

threshold_vel=0.15;

%%%% Section 2: Main program

compiled_run_len=[];

compiled_lengthpause=[];

compiled_lengthruns=[];

compiled_vel=[];

for_print=[];

final_msd=[];

array_total=[];

frac_time_motion_final=[];

frac_change_direct_final=[];

track_vel=[];

duration_final=[];

final_msd_array4=[];

compiled_vel=[];

array_f12=[];

opts = delimitedTextImportOptions("NumVariables", 21);

opts.DataLines = [1, Inf];

opts.Delimiter = ",";

opts.VariableNames = ["Label", "ID", "TRACK_ID", "QUALITY", "POSITION_X", "POSITION_Y", "POSITION_Z", "POSITION_T", "FRAME", "RADIUS", "VISIBILITY", "MANUAL_COLOR", "MEAN_INTENSITY", "MEDIAN_INTENSITY", "MIN_INTENSITY", "MAX_INTENSITY", "TOTAL_INTENSITY", "STANDARD_DEVIATION", "ESTIMATED_DIAMETER", "CONTRAST", "SNR"];

opts.VariableTypes = ["double", "double", "double", "double", "double", "double", "double", "double", "double", "double", "double", "double", "double", "double", "double", "double", "double", "double", "double", "double", "double"];

opts.ExtraColumnsRule = "ignore";

opts.EmptyLineRule = "read";

opts = setvaropts(opts, "Label", "TrimNonNumeric", true);

opts = setvaropts(opts, "Label", "ThousandsSeparator", ",");

data_table = readtable(filname, opts);

clear opts

traj_no=table2array(data_table(:,3));

x=table2array(data_table(:,5));

y=table2array(data_table(:,6));

t=table2array(data_table(:,8));

traj_no=[traj_no;nan];

x=[x;nan];

y=[y;nan];

t=[t;nan];

total_rows=size(x,1);

xp1=x(2);

yp1=y(2);

tp1=t(2);

frame1=traj_no(2);

final_pause=[];

array_total=[];

for sta=3:total_rows

array_f=[];

frame2=traj_no(sta);

if frame1==frame2

xp1=[xp1 x(sta)];

yp1=[yp1 y(sta)];

tp1=[tp1 t(sta)];

frame1=traj_no(sta);

else

array_final=[tp1' xp1' yp1'];

array_f3=sort(array_final);

array_f2=array_f3(1:no_fr:end,:);

array_f4=array_f2(1:(end-1),:);

array_f5=array_f2(2:end,:);

xp=array_f2(:,2);

yp=array_f2(:,3);

tp=array_f2(:,1);

if (size(xp,1) >3)

time_temp=(array_f2(:,1)-array_f2(1,1));

dist=sqrt((array_f2(:,2)-array_f2(1,2)).^2+((array_f2(:,3)-array_f2(1,3)).^2));

act_dist=sqrt((array_f5(:,2)-array_f4(:,2)).^2+((array_f5(:,3)-array_f5(:,3)).^2));

time_d=array_f5(:,1)-array_f4(:,1);

vel_temp=act_dist./time_d;

vel_temp=cat(1,0,vel_temp);

int_dist_temp=cat(1,0,act_dist);

moving_part=zeros((size(act_dist,1)-1),1);

moving_part= act_dist<thresh_dist;

avg_vel_final_track=sum(act_dist)./time_temp(end);

finl_moving_part=cat(1,-100,moving_part);

po=size(tp)/3;

pt=size(tp);

for (tt=1:po)

for (tt2=1:(pt-tt))

time_diff=tp(tt+tt2)-tp(tt);

msd_temp=sqrt((xp(tt+tt2)-xp(tt)).^2+(yp(tt+tt2)-yp(tt)).^2);

final_msd_temp=[time_diff msd_temp];

final_msd_array4=vertcat(final_msd_array4,final_msd_temp);

end

end

% finding duration

f = find(diff([1,moving_part',1]==0));

p = f(1:2:end-1);

t2=f(2:2:end);

duration=tp(t2)-tp(p);

duration_final=[duration_final duration'];

% finding angle

xy_1=[xp(1:(end-2)) yp(1:(end-2))];

xy_2=[xp(2:(end-1)) yp(2:(end-1))];

xy_3=[xp(3:end) yp(3:end)];

dist12=sqrt((xy_1(:,1)-xy_2(:,1)).^2+(xy_1(:,2)-xy_2(:,2)).^2);

dist13=sqrt((xy_1(:,1)-xy_3(:,1)).^2+(xy_1(:,2)-xy_3(:,2)).^2);

dist23=sqrt((xy_3(:,1)-xy_2(:,1)).^2+(xy_3(:,2)-xy_2(:,2)).^2);

thetha=(dist12.^2+dist23.^2-dist13.^2)./(2*(dist23.*dist12));

direction=acosd(thetha);

change_angle=sum(thetha<90);

dir_temp=cat(1,-100,direction,-100);

end

xp=[];

yp=[];

tp=[];

xp1=x(sta);

yp1=y(sta);

tp1=t(sta);

frame1=traj_no(sta);

array_f=[time_temp dist vel_temp int_dist_temp dir_temp finl_moving_part];

array_total=vertcat(array_total,array_f);

total_time=numel(moving_part(:))+1;

if total_time > threshold_time

moving_time=sum(moving_part);

frac_moving=[moving_time./total_time];

frac_change_direct= change_angle./(total_time-1);

frac_time_motion_final=vertcat(frac_time_motion_final,frac_moving);

frac_change_direct_final=cat(1,frac_change_direct_final,frac_change_direct);

end

track_vel=cat(1,track_vel,avg_vel_final_track);

end

end

delta_time=array_total(:,1); % this is the varibale for time

msd=array_total(:,2); % this is the varibale for MSD over time

temp_msd=[delta_time msd];

final_msd=vertcat(final_msd,temp_msd);

inst_vel=array_total(:,3); % this is the varibale for instanteous velocity per second

compiled_vel=vertcat(compiled_vel,inst_vel);

inst_dir=array_total(:,5); % this is the varibale for direction

over_msd_array=array_total(:,4); % this is the varibale for distance traveled per second

run_pause=array_total(:,6); % this is the varibale for whether pause or not

no_trajectories=sum(delta_time==0);

size_traj_filt=size(array_total,1);

compiled_vel_filt=compiled_vel(compiled_vel>threshold_vel);

msd_plot=[final_msd(:,1) final_msd(:,2)];

msd_plot_sorted=sort(final_msd_array4);

[time,ia,idx] = uniquetol(msd_plot_sorted(:,1),0.005);

N = accumarray(idx, 1);

N2=(N>5);

msd_mean = accumarray(idx,msd_plot_sorted(:,2),[],@mean);

msd_std = accumarray(idx,msd_plot_sorted(:,2),[],@std);

msd_array=[N2 time msd_mean msd_std N];

final_msd_array=msd_array((msd_array(:,1) ~= 0),2:5);

%%%% Section 3: Output files

xlswrite('inst_vel.xlsx',compiled_vel_filt)

xlswrite('msd.xlsx',final_msd_array)

xlswrite('track_vel.xlsx',track_vel)

xlswrite('frac_duration.xlsx',frac_time_motion_final)

% xlswrite('frac_change_direction.xlsx',frac_change_direct_final)

xlswrite('pause_duration.xlsx',duration_final')
